# Supplementary material for: Coxiella burnetii in Humans and Ticks in Rural Senegal
Source: PLOS journal article supplement (doi:10.1371/journal.pntd.0000654), 2010-04-06
Supplement: S2 (10.1371/journal.pntd.0000654.s002) [file journal.pntd.0000654.s002]

| 1 | *Abiotrophia defectiva* |
| --- | --- |
| 2 | *Acinetobacter baumannii* |
| 3 | *Acinetobacter lwoffii* |
| 4 | *Actinomyces massiliensis* |
| 5 | *Aerococcus viridans* |
| 6 | *Afipia felis* |
| 7 | *Alishewanella fetalis* |
| 8 | *Alistipes finegoldii* |
| 9 | *Alterococcus agarolyticus* |
| 10 | *Anaplasma phagocytophilum* |
| 11 | *Atopobium vaginae* |
| 12 | *Avibacterium paragallinarum* |
| 13 | *Bacillus cereus* |
| 14 | *Bacillus coagulans* |
| 15 | *Bacillus halodurans* |
| 16 | *Bacillus mycoides* |
| 17 | *Bacillus neidei* |
| 18 | *Bacteroides fragilis* |
| 19 | *Bacteroides thetaiotaomicron* |
| 20 | *Bacteroides vulgatus* |
| 21 | *Bartonella elisabethae* |
| 22 | *Bartonella henselae* |
| 23 | *Bifidobacterium sp.* |
| 24 | *Bordetella holmesii* |
| 25 | *Bordetella parapertussis* |
| 26 | *Bordetella pertussis* |
| 27 | *Borrelia afzelii* |
| 28 | *Borrelia andersonii* |
| 29 | *Borrelia anserina* |
| 30 | *Borrelia burgdorferi* |
| 31 | *Borrelia duttoni* |
| 32 | *Borrelia hermsii* |
| 33 | *Borrelia japonica* |
| 34 | *Borrelia lusitaniae* strainIR345 |
| 35 | *Borrelia lusitaniae* strainPOTI B2-1 |
| 36 | *Borrelia parkerii* |
| 37 | *Borrelia recurrentis* |
| 38 | *Borrelia sinica* |
| 39 | *Borrelia valaisiana* |
| 40 | *Bosea eneae* |
| 41 | *Bosea massiliensis* |
| 42 | *Bosea vestrisii* |
| 43 | *Bradyrhizobium lioaningense* |
| 44 | *Brenneria alni* |
| 45 | *Brenneria nigrifluens* |
| 46 | *Brenneria rubrifaciens* |
| 47 | *Budvicia aquatica* |
| 48 | *Buttiauxella brennerae* |
| 49 | *Buttiauxella noackiae* |
| 50 | *Campylobacter coli* |
| 51 | *Campylobacter fetus* ssp*. fetus* |
| 52 | *Campylobacter fetus* ssp*. venerealis* |
| 53 | *Campylobacter helveticus* |
| 54 | *Campylobacter hominis* |
| 55 | *Campylobacter hyointestinalis* |
| 56 | *Campylobacter jejuni* ssp*. jejuni* |
| 57 | *Campylobacter lari* |
| 58 | *Campylobacter sputorum* |
| 59 | *Campylobacter upsaliensis* |
| 60 | *Candidatus Diplorickettsia massiliensis* |
| 61 | *Capnocytophaga canimorsus* |
| 62 | *Capnocytophaga gingivalis* |
| 63 | *Capnocytophaga granulosa* |
| 64 | *Capnocytophaga haemolytica* |
| 65 | *Capnocytophaga ochracea* |
| 66 | *Capnocytophaga sputigena* |
| 67 | *Chlamydia psittacii* |
| 68 | *Citrobacter farmeri* |
| 69 | *Citrobacter freundii* |
| 70 | *Citrobacter koseri* |
| 71 | *Citrobacter murliniae* |
| 72 | *Citrobacter werkmanii* |
| 73 | *Citrobacter youngae* |
| 74 | *Corynebacterium accolens* |
| 75 | *Corynebacterium afermentans* ssp*. afermentans* |
| 76 | *Corynebacterium amycolatum* |
| 77 | *Corynebacterium diphteriae* |
| 78 | *Corynebacterium freneyi* |
| 79 | *Corynebacterium imitans* |
| 80 | *Corynebacterium jeikeium* |
| 81 | *Corynebacterium minutissimum* |
| 82 | *Corynebacterium pseudodiphteriticum* |
| 83 | *Corynebacterium seminale* |
| 84 | *Corynebacterium striatum* |
| 85 | *Corynebacterium urealyticum* |
| 86 | *Coxiella burnettii* |
| 87 | *Enterobacter aerogenes* |
| 88 | *Enterobacter cloacae* |
| 89 | *Enterobacter cowanii* |
| 90 | *Enterobacter gergoviae* |
| 91 | *Enterococcus saccharolyticus* |
| 92 | *Enterococcus avium* |
| 93 | *Enterococcus casseliflavus* |
| 94 | *Enterococcus cecorum* |
| 95 | *Enterococcus durans* |
| 96 | *Enterococcus faecalis* |
| 97 | *Enterococcus faecium* |
| 98 | *Enterococcus flavescens* |
| 99 | *Enterococcus gallinarum* |
| 100 | *Enterococcus gilvus* |
| 101 | *Enterococcus hirae* |
| 102 | *Enterococcus italicus* |
| 103 | *Enterococcus pallens* |
| 104 | *Enterococcus ratti* |
| 105 | *Enterococcus saccharolyticus* |
| 106 | *Enterococcus villorum* |
| 107 | *Erwinia malivora* |
| 108 | *Escherichia albertii* |
| 109 | *Escherichia coli* |
| 110 | *Escherichia fergusonii* |
| 111 | *Escherichia vulneris* |
| 112 | *Ewingella americana* |
| 113 | *Francisella tularensis* |
| 114 | *Gardnerella vaginalis* |
| 115 | *Gemella bergeri* |
| 116 | *Gemella morbillorum* |
| 117 | *Gemella sanguinis* |
| 118 | *Granulicatella adiacens* |
| 119 | *Haemophilus actinomycetemcomitans* |
| 120 | *Haemophilus agni* |
| 121 | *Haemophilus aphrophilus* |
| 122 | *Haemophilus ducreyi* |
| 123 | *Haemophilus felis* |
| 124 | *Haemophilus haemolyticus* |
| 125 | *Haemophilus influenzae* |
| 126 | *Haemophilus parahaemolyticus* |
| 127 | *Haemophilus piscium* |
| 128 | *Haemophilus segnis* |
| 129 | *Hafnia alvei* |
| 130 | *Klebsiella ornithinolytica* |
| 131 | *Klebsiella oxytoca* |
| 132 | *Klebsiella pneumoniae* ssp*. ozaenae* |
| 133 | *Klebsiella pneumoniae* ssp*. pneumoniae* |
| 134 | *Klebsiella pneumoniae* ssp*. rhinoscleromatis* |
| 135 | *Kluyvera ascorbata* |
| 136 | *Kluyvera intermedia* |
| 137 | *Lactobacillus intestinalis* |
| 138 | *Lactobacillus spicheri* |
| 139 | *Lactobacillus vaginalis* |
| 140 | *Lactobacillus zeae* |
| 141 | *Lactobacillus zymae* |
| 142 | *Lactobacillus acidophilus* |
| 143 | *Lactobacillus agilis* |
| 144 | *Lactobacillus amylolyticus* |
| 145 | *Lactobacillus brevis* |
| 146 | *Lactobacillus casei* ssp*. casei* |
| 147 | *Lactobacillus fermentum* |
| 148 | *Lactobacillus fructivorans* |
| 149 | *Lactobacillus gasseri* |
| 150 | *Lactobacillus iners* |
| 151 | *Lactobacillus oris* |
| 152 | *Lactobacillus parakefiri* |
| 153 | *Lactobacillus rhamnosus* |
| 154 | *Lactococcus garvieae* |
| 155 | *Lactococcus lactis* ssp*. cremoris* |
| 156 | *Lactococcus lactis* ssp*. hordniae* |
| 157 | *Lactococcus piscium* |
| 158 | *Lactococcus plantarum* |
| 159 | *Lactococcus raffinolactis* |
| 160 | *Legionella bozemanii* |
| 161 | *Legionella feelii* |
| 162 | *Legionella longbeachae* |
| 163 | *Legionella maceachernii* |
| 164 | *Legionella micdadei* |
| 165 | *Legionella parisiensis* |
| 166 | *Legionella pneumophila* |
| 167 | *Legionella quinlivanii* |
| 168 | *Legionella rubrilucens* |
| 169 | *Legionella taurinensis* |
| 170 | *Legionelle cincinnatiensis* |
| 171 | *Leptospira fainei* |
| 172 | *Leptospira meyeri/Leptospira ranarum* |
| 173 | *Leptospira noguchi/Leptospira panama* |
| 174 | *Leptospira weilli/Leptospira celladoni* |
| 175 | *Leptotrichia trevisanii* |
| 176 | *Leuconostoc mesenteroides* |
| 177 | *Listeria monocytogenes* |
| 178 | *Listeria seeligeri* |
| 179 | *Methanobrevibacter oralis* |
| 180 | *Methanosphaera stadtmaniae* |
| 181 | *Mobilincus mulieris* |
| 182 | *Mycobacterium abscessus* |
| 183 | *Mycobacterium asiaticum* |
| 184 | *Mycobacterium avium* ssp*. avium* |
| 185 | *Mycobacterium bohemicum* |
| 186 | *Mycobacterium branderi* |
| 187 | *Mycobacterium chitae* |
| 188 | *Mycobacterium elephantis* |
| 189 | *Mycobacterium fallax* |
| 190 | *Mycobacterium flavescens* |
| 191 | *Mycobacterium fortuitum* ssp*. acetamidolyticum* |
| 192 | *Mycobacterium fortuitum* ssp*. fortuitum* |
| 193 | *Mycobacterium haemophilum* |
| 194 | *Mycobacterium heidelbergense* |
| 195 | *Mycobacterium hiberniae* |
| 196 | *Mycobacterium intermedium* |
| 197 | *Mycobacterium intracellulare* |
| 198 | *Mycobacterium kansasii* |
| 199 | *Mycobacterium lentiflavum* |
| 200 | *Mycobacterium novocastrence* |
| 201 | *Mycobacterium parafortuitum* |
| 202 | *Mycobacterium phlei* |
| 203 | *Mycobacterium ratisbonense* |
| 204 | *Mycobacterium septicum* |
| 205 | *Mycobacterium simiae* |
| 206 | *Mycobacterium smegmatis* |
| 207 | *Mycobacterium szulgai* |
| 208 | *Mycobacterium terrae* |
| 209 | *Mycobacterium tuberculosis* |
| 210 | *Mycobacterium vaccae* |
| 211 | *Mycobacterium wolinski* |
| 212 | *Mycobacterium xenopi* |
| 213 | *Mycoplasma arthritidis* |
| 214 | *Mycoplasma auris* |
| 215 | *Mycoplasma fermentans* |
| 216 | *Mycoplasma gallisepticum* |
| 217 | *Mycoplasma genitalium* |
| 218 | *Mycoplasma hominis* |
| 219 | *Mycoplasma mycoides* ssp*. mycoides* |
| 220 | *Mycoplasma orale* |
| 221 | *Mycoplasma pneumoniae* |
| 222 | *Mycoplasma pulmonis* |
| 223 | *Mycoplasma yeatsii* |
| 224 | *Neisseria flavescens* |
| 225 | *Neisseria gonorrhoeae* |
| 226 | *Neisseria meningitidis* |
| 227 | *Neisseria mucosa* |
| 228 | *Nocardia asteroides* |
| 229 | *Nocardia carnea* |
| 230 | *Nocardia otitidiscaviarum farcinica* |
| 231 | *Orientia tsutsugamushi* |
| 232 | *Paenibacillus chondroitinus* |
| 233 | *Paenibacillus sanguinis* |
| 234 | *Paenibacillus urinalis* |
| 235 | *Pantoea agglomerans* |
| 236 | *Pantoea stewartii* ssp*. indologenes* |
| 237 | *Pasteurella canis* |
| 238 | *Prevotella buccae* |
| 239 | *Prevotella disiens* |
| 240 | *Prevotella melaninogenica* |
| 241 | *Prevotella nigrescens* |
| 242 | *Prevotella oulora* |
| 243 | *Propionibacterium acidipropionici* |
| 244 | *Propionibacterium acnes* |
| 245 | *Propionibacterium granulosum* |
| 246 | *Propionibacterium propionicus* |
| 247 | *Proteus hauseri* |
| 248 | *Proteus mirabilis* |
| 249 | *Proteus penneri* |
| 250 | *Proteus vulgaris* |
| 251 | *Providencia rettgeri* |
| 252 | *Pseudomonas aeruginosa* |
| 253 | *Raoultella ornithinolytica* |
| 254 | *Raoultella terrigena* |
| 255 | *Rhodobacter massiliae* |
| 256 | *Rickettsia aeschlemani* |
| 257 | *Rickettsia africae* |
| 258 | *Rickettsia bellii* |
| 259 | *Rickettsia conorii* |
| 260 | *Rickettsia felis* |
| 261 | *Rickettsia helvetica* |
| 262 | *Rickettsia massiliae* |
| 263 | *Rickettsia montana* |
| 264 | *Rickettsia montanensis* |
| 265 | *Rickettsia raoultii* strainKhabarovsk |
| 266 | *Rickettsia raoultii* strainMarne |
| 267 | *Rickettsia slovaca* |
| 268 | *Salmonella bongori* |
| 269 | *Salmonella enterica* ssp*. arizonae* |
| 270 | *Salmonella enterica* ssp*. enterica* |
| 271 | *Salmonella enterica* ssp*. houtenae* |
| 272 | *Serratia ficaria* |
| 273 | *Serratia liquefaciens* |
| 274 | *Serratia marcescens* |
| 275 | *Serratia odorifera* |
| 276 | *Serratia rubidaea* |
| 277 | *Shigella boydii* |
| 278 | *Shigella dysenteriae* |
| 279 | *Shigella flexneri* |
| 280 | *Shigella sonnei* |
| 281 | *Spironema culicis* |
| 282 | *Staphylococcus aureus* |
| 283 | *Staphylococcus capitis* |
| 284 | *Staphylococcus caprae* |
| 285 | *Staphylococcus condimenti* |
| 286 | *Staphylococcus epidermidis* |
| 287 | *Staphylococcus fleurettii* |
| 288 | *Staphylococcus gallinarum* |
| 289 | *Staphylococcus hyicus* |
| 290 | *Staphylococcus intermedius* |
| 291 | *Staphylococcus kloosii* |
| 292 | *Staphylococcus lentus* |
| 293 | *Staphylococcus muscae* |
| 294 | *Staphylococcus saprophyticus* |
| 295 | *Staphylococcus schleiferi* ssp*. coagulans* |
| 296 | *Staphylococcus sciuri* |
| 297 | *Staphylococcus sucinus* |
| 298 | *Staphylococcus vitulinus* |
| 299 | *Staphylococcus warneri* |
| 300 | *Stenotrophomonas maltophila* |
| 301 | *Streptococcus acidominimus* |
| 302 | *Streptococcus agalactiae* |
| 303 | *Streptococcus anginosus* |
| 304 | *Streptococcus australis* |
| 305 | *Streptococcus castoreus* |
| 306 | *Streptococcus constellatus* ssp*. constellatus* |
| 307 | *Streptococcus devriesei* |
| 308 | *Streptococcus didelphis* |
| 309 | *Streptococcus equi* ssp*. equi* |
| 310 | *Streptococcus equinus* |
| 311 | *Streptococcus gallinaceus* |
| 312 | *Streptococcus gallolyticus* ssp*. gallolyticus* |
| 313 | *Streptococcus gallolyticus* ssp*. macedonicus* |
| 314 | *Streptococcus gordonii* |
| 315 | *Streptococcus hyointestinalis* |
| 316 | *Streptococcus hyovaginalis* |
| 317 | *Streptococcus infantarius* ssp*. infantarius* |
| 318 | *Streptococcus infantis* |
| 319 | *Streptococcus intermedius* |
| 320 | *Streptococcus macacae* |
| 321 | *Streptococcus oligofermentans* |
| 322 | *Streptococcus oralis* |
| 323 | *Streptococcus parasanguinis* |
| 324 | *Streptococcus parauberis* |
| 325 | *Streptococcus pluranimalium* |
| 326 | *Streptococcus porcinus* |
| 327 | *Streptococcus pyogenes* |
| 328 | *Streptococcus ratti* |
| 329 | *Streptococcus salivarius* |
| 330 | *Streptococcus sanguinis* |
| 331 | *Streptococcus suis* |
| 332 | *Streptococcus thermophilus* |
| 333 | *Streptococcus thoraltensis* |
| 334 | *Tropheryma whipplei* |
| 335 | *Ureaplasma urealyticum* |
| 336 | *Veillonella caviae* |
| 337 | *Veillonella criceti* |
| 338 | *Veillonella montpellierensis* |
| 339 | *Veillonella parvula* |
| 340 | *Veillonella rodentium* |
| 341 | *Vibrio parahaemolyticus* |
| 342 | *Yernisia pseudotuberculosis* |
| 343 | *Yersinia kristensenii* |
| 344 | *Yersinia mollaretii* |
| 345 | *Yersinia pestis* |
| 346 | *Yersinia rohdei* |
| 347 | *Yersinia ruckeri* |
