# Supplementary material for: Coxiella burnetii in Humans and Ticks in Rural Senegal
Source: PLOS journal article supplement (doi:10.1371/journal.pntd.0000654), 2010-04-06
Supplement: S3 (10.1371/journal.pntd.0000654.s003) [file journal.pntd.0000654.s003]

| *Coxiella burnetii* dilutions | Ct number with semiquantitative PCR for *sodB* gene | Quantification with respect of cloned gene (24) | Ct number with semiquantitative PCR for IS 1111 spacer | Quantification calculated with regard of *sodB* copies | Ct number with semiquantitative PCR for IS 30A spacer | Quantification calculated with regard of *sodB* copies |
| --- | --- | --- | --- | --- | --- | --- |
| Experiment 1 | | | | | | |
| CB 10-4 | 22.53 | 1.474 | 18.36 | 1.804 | 23.66 | 1.394 |
| CB 10-5 | 26.11 | 9.862 | 21.78 | 1.183 | 27.39 | 9.392 |
| CB 10-6 | 28.26 | 1.932 | 24.61 | 2.212 | 29.89 | 1.822 |
| CB 10-7 | 31.12 | 22 | 27.75 | 24 | 33.22 | 20 |
| CB 10-8 | 30.98 | 24 | 30.76 | 24 | 35.82 | 20 |
| CB 10-9 | 31.35 | 18 | 36.79 | 15 | NEG | NEG |
| CB 10-10 | NEG | NEG | NEG | NEG | NEG | NEG |
| Experiment 2 | | | | | | |
| CB 10-4 | 21.77 | 2.624 | 18.16 | 3.144 | 23.43 | 2.434 |
| CB 10-5 | 25.56 | 1.483 | 21.86 | 1.733 | 27.29 | 1.383 |
| CB 10-6 | 29.02 | 1.082 | 24.58 | 1.272 | 29.82 | 1.052 |
| CB 10-7 | 30.54 | 34 | 27.66 | 37 | 33.26 | 31 |
| CB 10-8 | 31.89 | 12 | 31.10 | 12 | 35.66 | 11 |
| CB 10-9 | 31.85 | 12 | 33.95 | 11 | 37.00 | 10,1 |
| CB 10-10 | NEG | NEG | NEG | NEG | NEG | NEG |
